# Supplementary material for: Oxygen Gas Sensing Using a Hydrogel-Based Organic Electrochemical Transistor for Work Safety Applications
Source: Polymers (Basel). 2022 Mar 3;14(5):1022. doi: 10.3390/polym14051022 (PMC8912781; doi:10.3390/polym14051022)
Supplement: Supplementary file 1 [file polymers-14-01022-s001.zip › polymers-1577615-supplementary.pdf]

# Supplementary Material: Gas-Oxygen Sensing Using a Hydrogel-Based Organic Electrochemical Transistor for Work Safety Applications

Francesco Decataldo, Filippo Bonafè, Federica Mariani, Martina Serafini, Marta Tessarolo, Isacco Gualandi, Erika Scavetta, Beatrice Fraboni

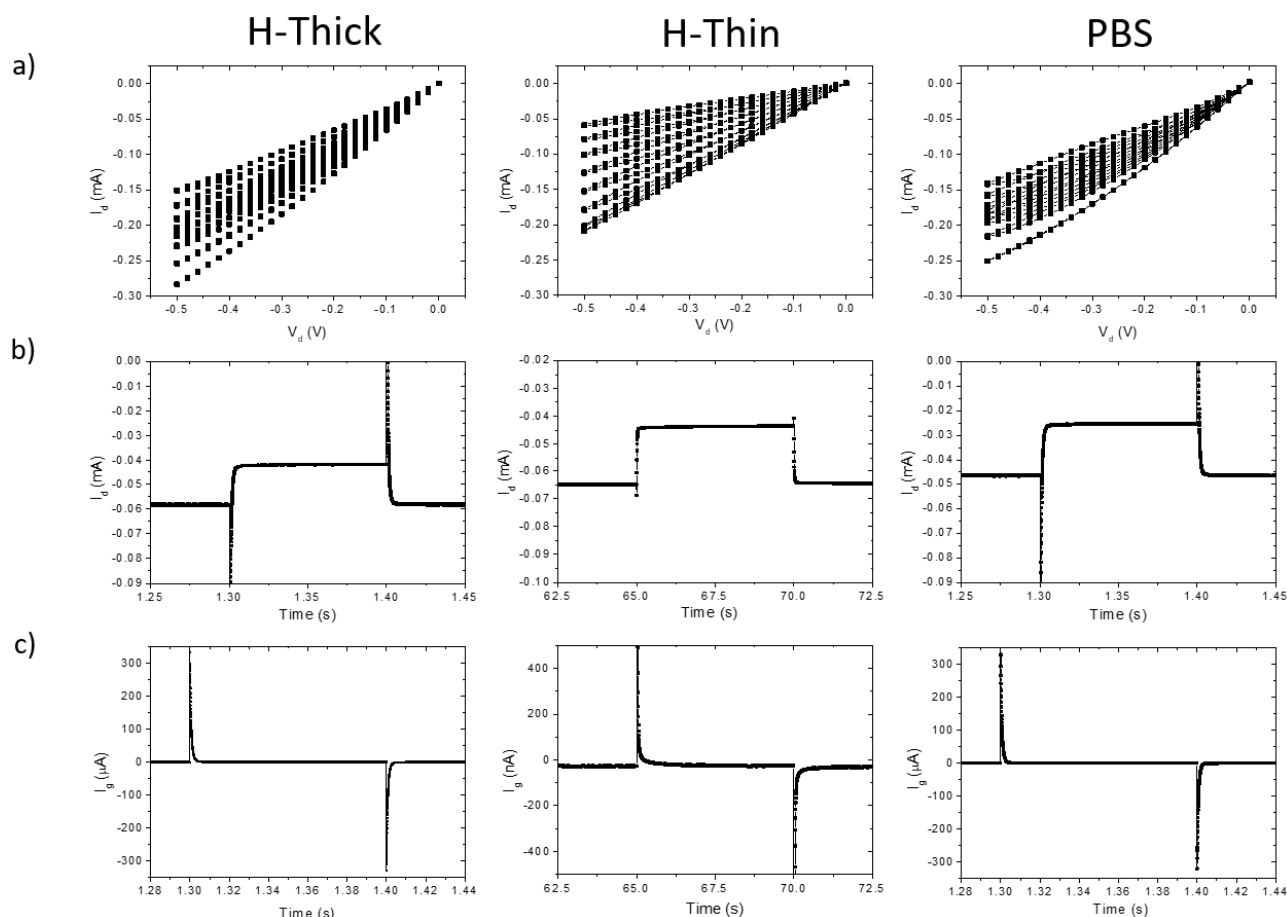

**Figure S1.** a) Output curves for OEET having the thick hydrogel (left), the thin one (center) or PBS (right) as electrolyte for gating.  $I_d(t)$  (b) and  $I_g(t)$  (c) OEET responses upon the application of a square positive voltage on the gate (+0.3V).

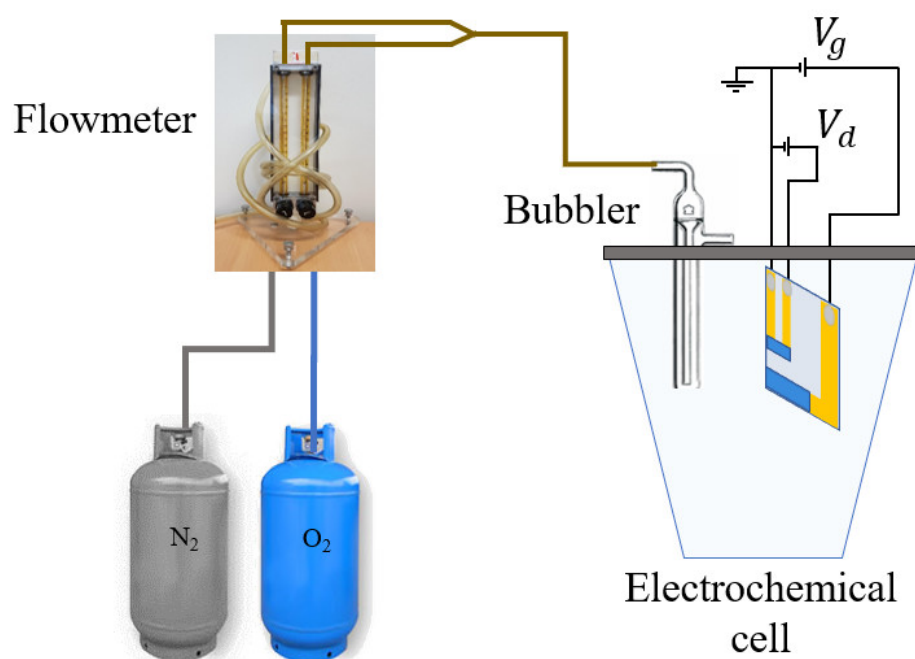

**Figure S2.** Experimental setup for the oxygen sensing measurements. A flowmeter is used to mix nitrogen and oxygen in the required percentage, which is then fluxed inside the sealed electrochemical cell through a bubbler.

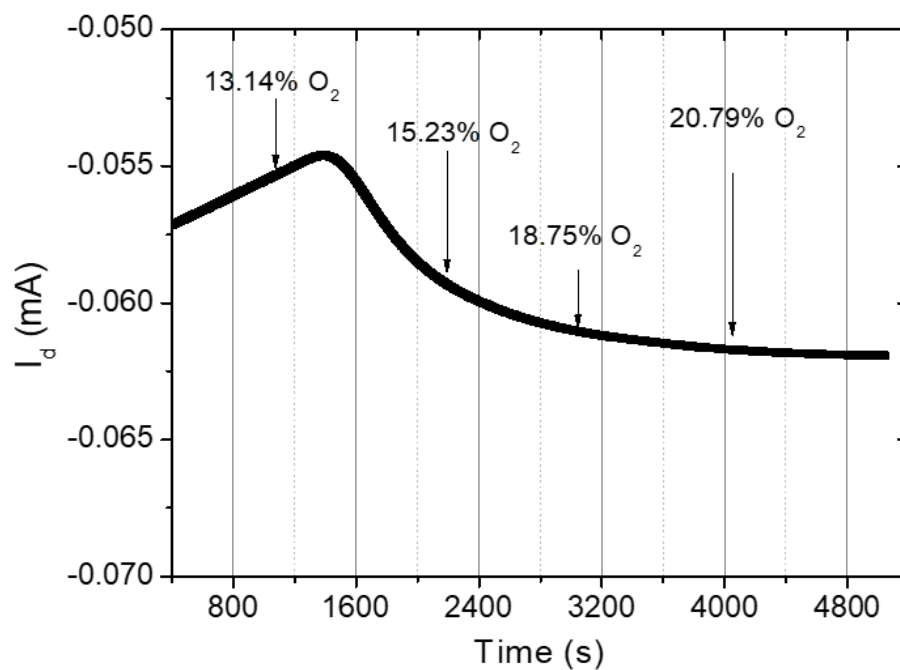

**Figure S3.** Oxygen sensing using a H-Thick OECT, thus having the 5mm-thick hydrogel as electrolyte.

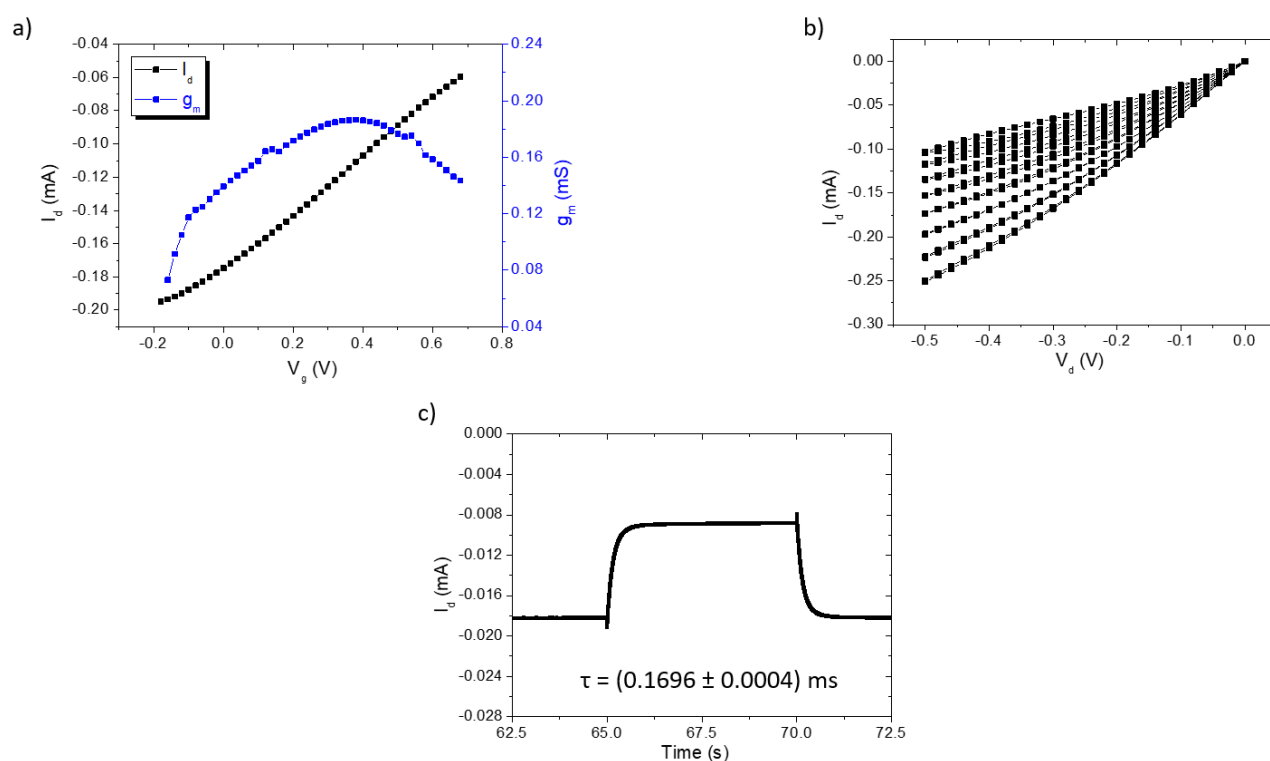

**Figure S4.** Glycerol-treated, H-Thin OECT electrical performances. Transcharacteristic curve (black dotted line) and relative transconductance (blue dotted line) (a), output (b) and current modulation response upon the application of a square voltage pulse (0.3V) on the gate (c), showing comparable values to the electrical characterization obtained without glycerol coating.

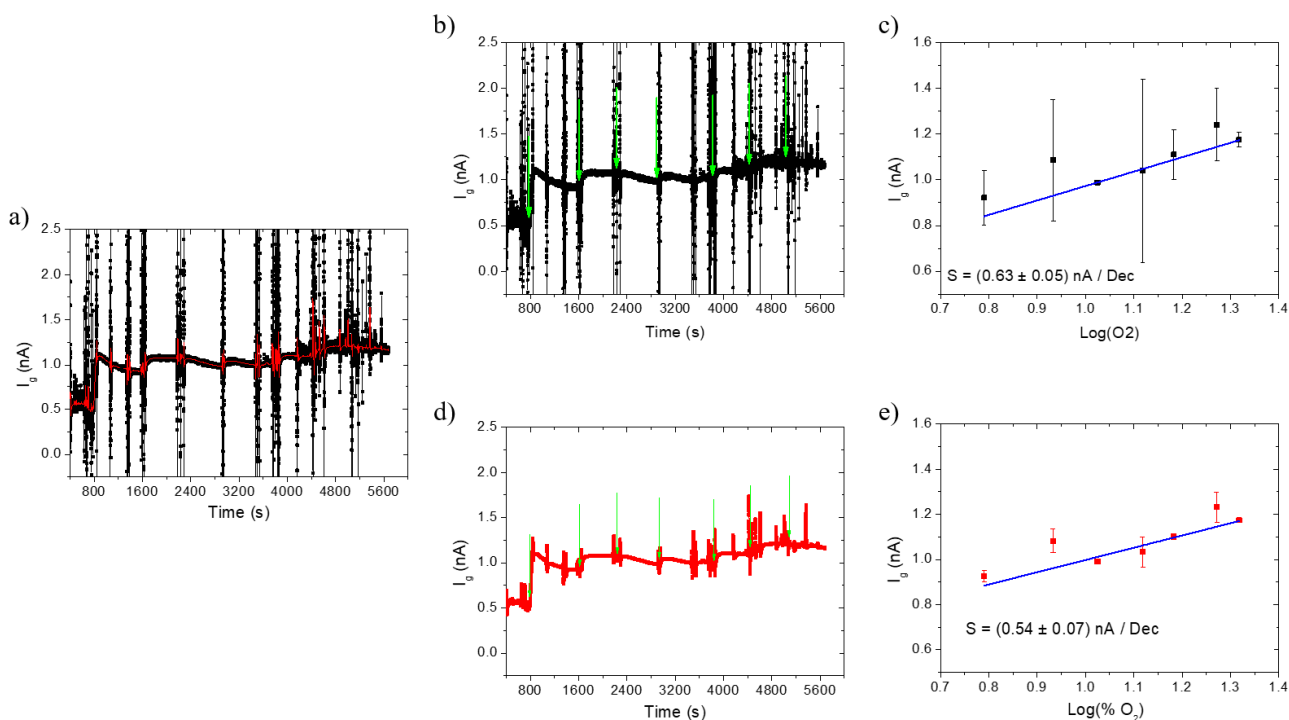

**Figure S5.** H-thin OECT on plastic substrate for oxygen sensing. (a) Bare  $I_g(t)$  measurement (black dotted line) and smoothed data (red line) upon oxygen additions in the sealed cell, starting from a nitrogen-saturated environment (0% of  $\text{O}_2$ ).  $I_g(t)$  measurement (b) with oxygen additions (green arrows) and relative sensor calibration curve (c) for the bare data.  $I_g(t)$  measurement (d) with oxygen additions (green arrows) and relative sensor calibration curve (e) for the smoothed data.

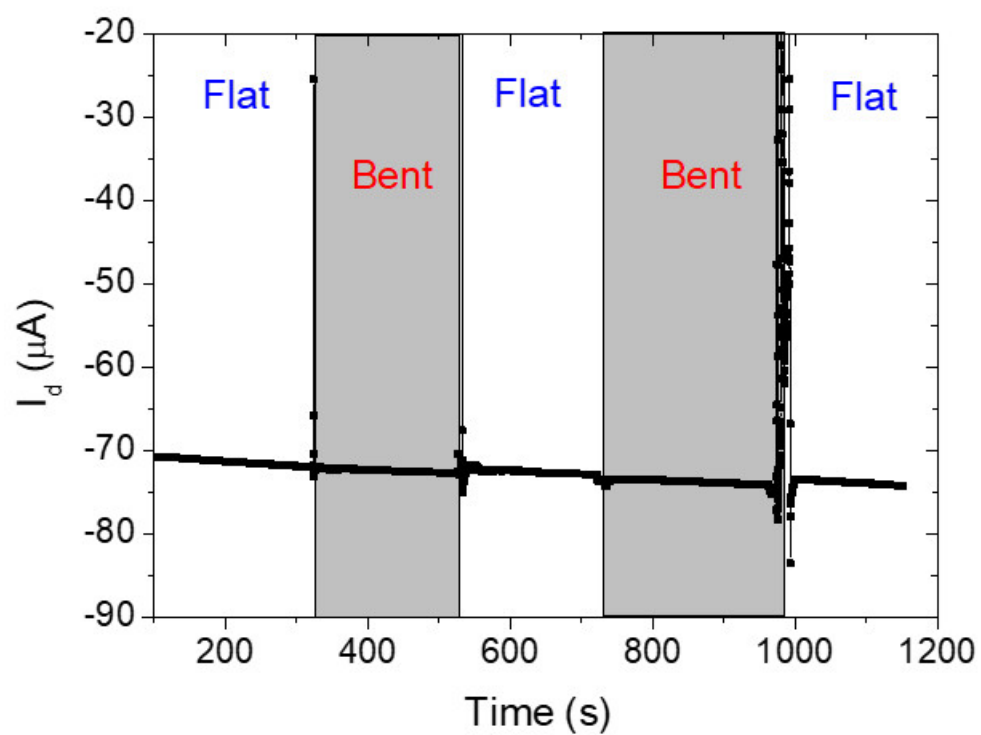

**Figure S6.** Repeated flat versus bent sequence test in air at constant transistor polarization ( $V_d = -0.3\text{V}$ ,  $V_g = 0.3\text{V}$ ).
